# Supplementary material for: Organic additive-free synthesis of mesocrystalline hematite nanoplates via two-dimensional oriented attachment
Source: Royal Society of Chemistry journal article supplement (doi:10.1039/c3ce41716f), 2013-10-30
Supplement: c3ce41716f.pdf [file c3ce41716f.pdf]

## Electronic supplementary information

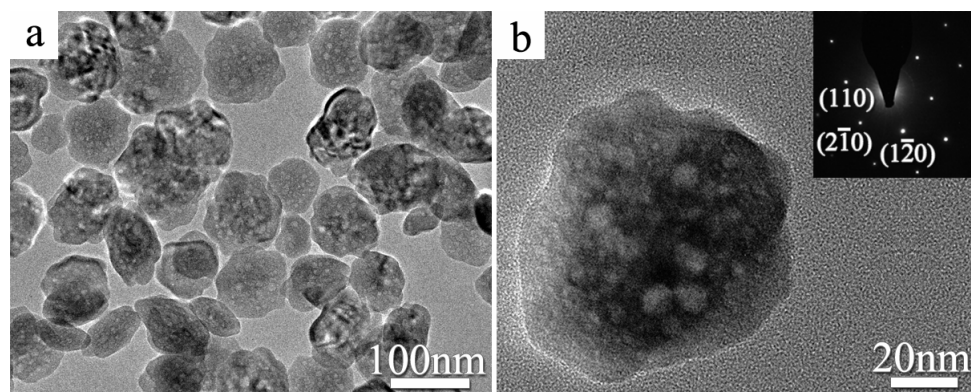

**Fig. S1** TEM images of mesocrystalline  $\alpha$ -Fe<sub>2</sub>O<sub>3</sub> nanoplates calcined at 500 °C. Inset in (b) is the corresponding SAED pattern.

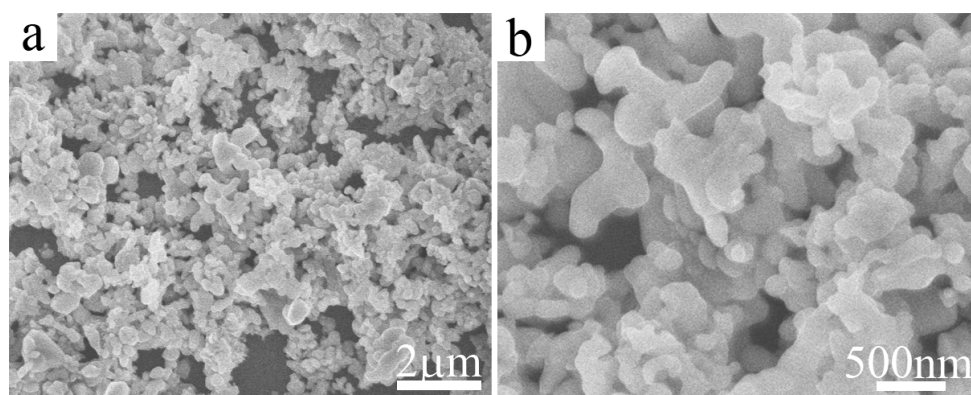

**Fig. S2** SEM images of commercial  $\alpha$ -Fe<sub>2</sub>O<sub>3</sub> powders obtained from Sinopharm Chemical Reagent Co., Ltd.
